# Supplementary material
Source: PubMed Central journal article supplement (PMC4508843)

Supplemental Figure 1. Age as a predictor of carpal tunnel syndrome with 95% confidence intervals, adjusted for gender and BMI.

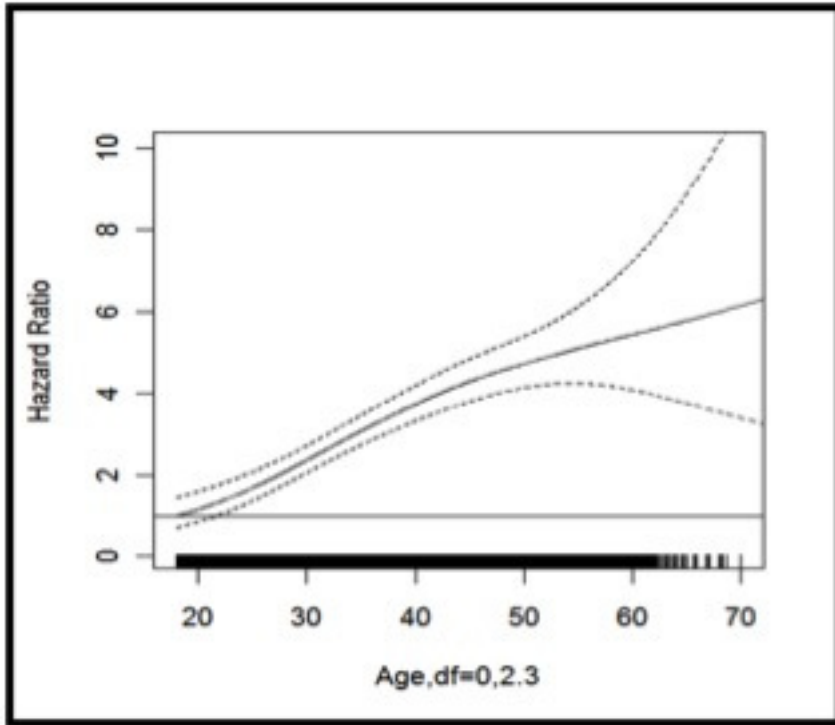

Supplemental Figure 2. BMI as a predictor of carpal tunnel syndrome with 95% confidence intervals, adjusted for gender and age.

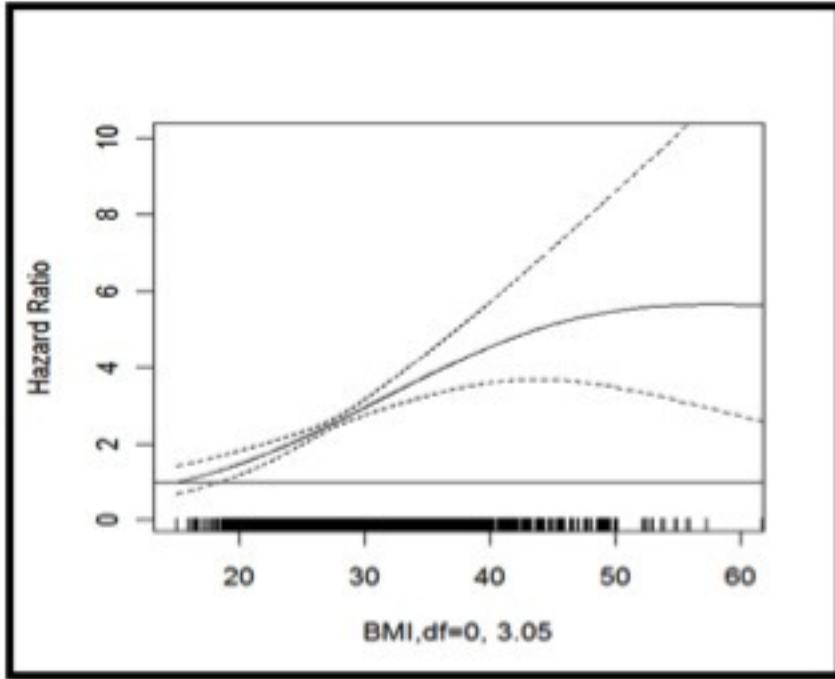

Supplement: NIHMS701981-supplement-Diagrams.pdf [file NIHMS701981-supplement-Diagrams.pdf]
